# Supplementary material for: Development of a ReaxFF reactive force field for lithium ion conducting solid electrolyte Li1+xAlxTi2−x(PO4)3 (LATP)
Source: Royal Society of Chemistry journal article supplement (doi:10.1039/c8cp03586e), 2018-01-01
Supplement: c8cp03586e1.pdf [file c8cp03586e1.pdf]

## Supporting Information

# Development of a ReaxFF reactive force field for lithium ion conducting solid electrolyte $\text{Li}_{1+x}\text{Al}_x\text{Ti}_{2-x}(\text{PO}_4)_3$ (LATP)

Yun Kyung Shin,<sup>†</sup> Mert Y. Sengul,<sup>†,||</sup> A. S. M. Jonayat,<sup>†</sup> Wonho Lee,<sup>‡</sup> Enrique D. Gomez,<sup>‡,||</sup> Clive A. Randall<sup>||</sup> and Adri C. T. van Duin<sup>\*,†</sup>

<sup>†</sup> Department of Mechanical and Nuclear Engineering, Pennsylvania State University, University Park, Pennsylvania 16802, United States

<sup>‡</sup> Department of Chemical Engineering, Pennsylvania State University, University Park, Pennsylvania 16802, United States

<sup>||</sup> Department of Materials Science and Engineering, Materials Research Institute, Pennsylvania State University, University Park, Pennsylvania 16802, United States

\* Corresponding author: [acv13@engr.psu.edu](mailto:acv13@engr.psu.edu)

### ReaxFF reactive force field parameters for the solid electrolyte LATP materials

This force field can be used with the standalone ReaxFF program, as well as with the LAMMPS open-source MD-program and the ADF-program.

Reactive MD-force field: Li/Al/Ti/P/O/H/C ARPA-E June 20, 2017

```
39      ! Number of general parameters
50.0000 !Overcoordination parameter
 9.5469 !Overcoordination parameter
 1.4254 !Valency angle conjugation parameter
 1.7224 !Triple bond stabilisation parameter
 6.8702 !Triple bond stabilisation parameter
60.4850 !C2-correction
 1.0588 !Undercoordination parameter
 4.6000 !Triple bond stabilisation parameter
12.1176 !Undercoordination parameter
13.3056 !Undercoordination parameter
-40.0000 !Triple bond stabilization energy
 0.0000 !Lower Taper-radius
10.0000 !Upper Taper-radius
 2.8793 !Not used
33.8667 !Valency undercoordination
 6.0891 !Valency angle/lone pair parameter
 1.0563 !Valency angle
 2.0384 !Valency angle parameter
 6.1431 !Not used
```

```

6.9290 !Double bond/angle parameter
0.3989 !Double bond/angle parameter: overcoord
3.9954 !Double bond/angle parameter: overcoord
-2.4837 !Not used
5.7796 !Torsion/BO parameter
10.0000 !Torsion overcoordination
1.9487 !Torsion overcoordination
-1.2327 !Conjugation 0 (not used)
2.1645 !Conjugation
1.5591 !vdWaaals shielding
0.1000 !Cutoff for bond order (*100)
2.0000 !Valency angle conjugation parameter
0.6991 !Overcoordination parameter
50.0000 !Overcoordination parameter
1.8512 !Valency/lone pair parameter
0.5000 !Not used
20.0000 !Not used
5.0000 !Molecular energy (not used)
0.0000 !Molecular energy (not used)
2.0000 !Valency angle conjugation parameter
8 ! Nr of atoms; cov.r; valency;a.m;Rvdw;Evdw;gammaEEM;cov.r2;#
   alfa;gammavdW;valency;Eunder;Eover;chiEEM;etaEEM;n.u.
   cov.r3;Elp;Heat inc.;n.u.;n.u.;n.u.;n.u.
   ov/un;vall;n.u.;val3,vval4
C  1.3817  4.0000  12.0000  1.8903  0.1838  0.9000  1.1341  4.0000
   9.7559  2.1346  4.0000  34.9350  79.5548  5.9666  7.0000  0.0000
   1.2114  0.0000  202.2908  8.9539  34.9289  13.5366  0.8563  0.0000
   -2.8983  2.5000  1.0564  4.0000  2.9663  0.0000  0.0000  0.0000
H  0.8930  1.0000  1.0080  1.3550  0.0930  0.8203  -0.1000  1.0000
   8.2230  33.2894  1.0000  0.0000  121.1250  3.7248  9.6093  1.0000
   -0.1000  0.0000  55.1878  3.0408  2.4197  0.0003  1.0698  0.0000
   -19.4571  4.2733  1.0338  1.0000  2.8793  0.0000  0.0000  0.0000
O  1.2450  2.0000  15.9990  2.3890  0.1000  1.0898  1.0548  6.0000
   9.7300  13.8449  4.0000  37.5000  116.0768  8.5000  8.3122  2.0000
   0.9049  0.4056  68.0152  3.5027  0.7640  0.0021  0.9745  0.0000
   -3.5500  2.9000  1.0493  4.0000  2.9225  0.0000  0.0000  0.0000
P  1.5994  3.0000  30.9738  2.3976  0.4904  0.4655  1.3000  5.0000
   10.7864  2.7884  5.0000  0.0000  0.0000  3.4186  5.3855  0.0000
   -1.0000  3.3786  125.6300  0.5475  11.9674  17.3824  0.0000  0.0000
   -13.7379  2.8674  1.0338  5.0000  2.8793  0.0000  0.0000  0.0000
Ti 2.0254  4.0000  47.8800  2.2105  0.1574  0.6311  0.1000  4.0000
   12.7041  16.6482  4.0000  0.1000  0.0000  -1.3647  6.8406  0.0000
   -1.0000  0.0000  143.1770  27.6505  -0.0753  0.0064  0.8563  0.0000
   -15.0000  3.8359  1.0338  12.0000  2.2632  0.0000  0.0000  0.0000
Li 0.0001  1.0000  6.9410  2.6000  0.0865  0.8380  -0.1000  1.0000
   9.6984  1.4649  1.0000  0.0000  0.0000  -4.0561  9.7698  0.0000
   -1.0000  0.0000  37.5000  5.4409  6.9107  0.1973  0.8563  0.0000
   -24.7916  2.2989  1.0338  1.0000  2.8103  1.3000  0.2000  13.0000
Al 2.1967  3.0000  26.9820  2.3738  0.2328  0.4961  -1.6836  3.0000
   9.4002  1.6831  3.0000  0.0076  16.5151  -0.3343  6.5000  0.0000
   -1.0000  0.0000  78.4675  20.0000  0.2500  0.0000  0.8563  0.0000
   -23.1826  1.5000  1.0338  8.0000  2.5791  1.4000  0.2000  13.0000
X  -0.1000  2.0000  1.0080  2.0000  0.0000  0.0100  -0.1000  6.0000
   10.0000  2.5000  4.0000  0.0000  0.0000  5.00009999.9999  0.0000
   -0.1000  0.0000  -2.3700  8.7410  13.3640  0.6690  0.9745  0.0000
   -11.0000  2.7466  1.0338  2.0000  2.8793  0.0000  0.0000  0.0000
27 ! Nr of bonds; Edis1;LPpen;n.u.;pbel;pbo5;l3corr;pbo6
   pbe2;pbo3;pbo4;Etrip;pbo1;pbo2;ovcorr
1  1 158.2004  99.1897  78.0000  -0.7738  -0.4550  1.0000  37.6117  0.4147
   0.4590  -0.1000  9.1628  1.0000  -0.0777  6.7268  1.0000  0.0000
1  2 169.4760  0.0000  0.0000  -0.6083  0.0000  1.0000  6.0000  0.7652
   5.2290  1.0000  0.0000  1.0000  -0.0500  6.9136  0.0000  0.0000
2  2 153.3934  0.0000  0.0000  -0.4600  0.0000  1.0000  6.0000  0.7300

```

|    |                                                            |          |          |         |         |         |         |         |        |
|----|------------------------------------------------------------|----------|----------|---------|---------|---------|---------|---------|--------|
|    |                                                            | 6.2500   | 1.0000   | 0.0000  | 1.0000  | -0.0790 | 6.0552  | 0.0000  | 0.0000 |
| 1  | 3                                                          | 164.4303 | 82.6772  | 60.8077 | -0.3739 | -0.2351 | 1.0000  | 10.5036 | 1.0000 |
|    |                                                            | 0.4475   | -0.2288  | 7.0250  | 1.0000  | -0.1363 | 4.8734  | 0.0000  | 0.0000 |
| 3  | 3                                                          | 142.2858 | 145.0000 | 50.8293 | 0.2506  | -0.1000 | 1.0000  | 29.7503 | 0.6051 |
|    |                                                            | 0.3451   | -0.1055  | 9.0000  | 1.0000  | -0.1225 | 5.5000  | 1.0000  | 0.0000 |
| 2  | 3                                                          | 160.0000 | 0.0000   | 0.0000  | -0.5725 | 0.0000  | 1.0000  | 6.0000  | 0.5626 |
|    |                                                            | 1.1150   | 1.0000   | 0.0000  | 0.0000  | -0.0920 | 4.2790  | 0.0000  | 0.0000 |
| 1  | 4                                                          | 0.0000   | 0.0000   | 0.0000  | 0.2171  | -0.1418 | 1.0000  | 13.1260 | 0.6000 |
|    |                                                            | 0.3601   | -0.2500  | 20.0000 | 1.0000  | -0.2000 | 10.0000 | 1.0000  | 0.0000 |
| 2  | 4                                                          | 0.0000   | 0.0000   | 0.0000  | 0.2250  | -0.1418 | 1.0000  | 13.1260 | 0.6000 |
|    |                                                            | 0.3912   | -0.1310  | 0.0000  | 1.0000  | -0.2000 | 10.0000 | 0.0000  | 0.0000 |
| 3  | 4                                                          | 81.2440  | 136.3567 | 0.0000  | 0.8652  | -0.5000 | 1.0000  | 25.0000 | 0.2000 |
|    |                                                            | 3.5797   | -0.2067  | 16.0316 | 1.0000  | -0.2491 | 7.9507  | 1.0000  | 0.0000 |
| 4  | 4                                                          | 0.0000   | 0.0000   | 0.0000  | 0.2171  | -0.5000 | 1.0000  | 35.0000 | 0.6000 |
|    |                                                            | 0.5000   | -0.5000  | 20.0000 | 1.0000  | -0.2000 | 10.0000 | 1.0000  | 0.0000 |
| 1  | 5                                                          | 122.2875 | 0.0000   | 0.0000  | 0.9631  | -0.3000 | 0.0000  | 36.0000 | 0.5551 |
|    |                                                            | 0.3127   | -0.2818  | 16.1571 | 1.0000  | -0.1630 | 6.8622  | 0.0000  | 0.0000 |
| 2  | 5                                                          | 0.0000   | 0.0000   | 0.0000  | -0.2872 | -0.3000 | 1.0000  | 36.0000 | 0.0082 |
|    |                                                            | 1.7973   | -0.2500  | 20.0000 | 1.0000  | -0.2578 | 6.5219  | 1.0000  | 0.0000 |
| 3  | 5                                                          | 130.5629 | 37.6984  | 0.0000  | 0.9228  | -0.3000 | 0.0000  | 36.0000 | 0.0850 |
|    |                                                            | 0.1150   | -0.2818  | 16.1571 | 1.0000  | -0.1343 | 6.8264  | 0.0000  | 0.0000 |
| 4  | 5                                                          | 0.0000   | 0.0000   | 0.0000  | -0.2872 | -0.3000 | 1.0000  | 36.0000 | 0.0082 |
|    |                                                            | 1.7973   | -0.2500  | 20.0000 | 1.0000  | -0.2578 | 6.5219  | 1.0000  | 0.0000 |
| 5  | 5                                                          | 80.1930  | 0.0000   | 0.0000  | -0.8469 | -0.2000 | 0.0000  | 16.0000 | 0.2022 |
|    |                                                            | 0.7528   | -0.1924  | 14.9725 | 1.0000  | -0.0885 | 5.0000  | 0.0000  | 0.0000 |
| 1  | 6                                                          | 0.0000   | 0.0000   | 0.0000  | 0.3228  | 0.3000  | 0.0000  | 26.0000 | 0.6003 |
|    |                                                            | 1.7161   | 0.0000   | 12.0000 | 1.0000  | -0.1015 | 4.0000  | 0.0000  | 0.0000 |
| 2  | 6                                                          | 0.0000   | 0.0000   | 0.0000  | 1.0000  | -0.3000 | 1.0000  | 36.0000 | 0.0100 |
|    |                                                            | 0.3415   | -0.3500  | 25.0000 | 1.0000  | -0.2770 | 6.4396  | 1.0000  | 0.0000 |
| 3  | 6                                                          | 65.2411  | -0.0200  | 0.0000  | 0.1392  | 0.3000  | 0.0000  | 6.0000  | 0.1482 |
|    |                                                            | 0.0713   | -0.2500  | 11.9965 | 1.0000  | -0.0713 | 6.1903  | 0.0000  | 0.0000 |
| 6  | 6                                                          | 0.0000   | 0.0000   | 0.0000  | 0.3228  | 0.3000  | 0.0000  | 26.0000 | 0.6003 |
|    |                                                            | 1.7161   | 0.0000   | 12.0000 | 1.0000  | -0.1015 | 4.0000  | 0.0000  | 0.0000 |
| 5  | 6                                                          | 0.0000   | 0.0000   | 0.0000  | -0.8000 | -0.2000 | 0.0000  | 16.0000 | 0.0100 |
|    |                                                            | 0.5000   | 0.0000   | 12.0000 | 1.0000  | -0.1000 | 8.0000  | 0.0000  | 0.0000 |
| 2  | 7                                                          | 92.8579  | 0.0000   | 0.0000  | -0.6528 | -0.3000 | 0.0000  | 36.0000 | 0.1551 |
|    |                                                            | 10.0663  | -0.3500  | 25.0000 | 1.0000  | -0.0842 | 7.1758  | 0.0000  | 0.0000 |
| 3  | 7                                                          | 181.1998 | 0.0000   | 0.0000  | -0.2276 | -0.3000 | 0.0000  | 36.0000 | 0.1925 |
|    |                                                            | 0.2086   | -0.3500  | 25.0000 | 1.0000  | -0.2000 | 6.1462  | 0.0000  | 0.0000 |
| 6  | 7                                                          | 0.0000   | 0.0000   | 0.0000  | 1.0000  | 0.3000  | 0.0000  | 26.0000 | 1.0000 |
|    |                                                            | 0.5000   | 0.0000   | 12.0000 | 1.0000  | -0.2000 | 10.0000 | 0.0000  | 0.0000 |
| 7  | 7                                                          | 34.0777  | 0.0000   | 0.0000  | 0.4832  | -0.3000 | 0.0000  | 16.0000 | 0.5154 |
|    |                                                            | 6.4631   | -0.4197  | 14.3085 | 1.0000  | -0.1463 | 6.1608  | 0.0000  | 0.0000 |
| 4  | 6                                                          | 0.0000   | 0.0000   | 0.0000  | 1.0000  | 0.3000  | 0.0000  | 26.0000 | 1.0000 |
|    |                                                            | 0.5000   | 0.0000   | 12.0000 | 1.0000  | -0.2000 | 10.0000 | 0.0000  | 0.0000 |
| 4  | 7                                                          | 0.0000   | 0.0000   | 0.0000  | 1.0000  | 0.3000  | 0.0000  | 26.0000 | 1.0000 |
|    |                                                            | 0.5000   | 0.0000   | 12.0000 | 1.0000  | -0.2000 | 10.0000 | 0.0000  | 0.0000 |
| 5  | 7                                                          | 0.0000   | 0.0000   | 0.0000  | 0.2500  | -0.5000 | 1.0000  | 36.0000 | 0.6000 |
|    |                                                            | 0.5000   | -0.5000  | 20.0000 | 1.0000  | -0.2000 | 10.0000 | 1.0000  | 0.0000 |
| 18 | ! Nr of off-diagonal terms; Ediss;Ro;gamma;rsigma;rpi;rpi2 |          |          |         |         |         |         |         |        |
| 1  | 2                                                          | 0.1239   | 1.4004   | 9.8467  | 1.1210  | -1.0000 | -1.0000 |         |        |
| 2  | 3                                                          | 0.0283   | 1.2885   | 10.9190 | 0.9215  | -1.0000 | -1.0000 |         |        |
| 1  | 3                                                          | 0.1345   | 1.8422   | 9.7725  | 1.2835  | 1.1576  | 1.0637  |         |        |
| 3  | 4                                                          | 0.1472   | 1.7500   | 10.1210 | 1.6250  | 1.4379  | -1.0000 |         |        |
| 2  | 5                                                          | 0.1750   | 1.7939   | 13.5000 | 1.1000  | -1.0000 | -1.0000 |         |        |
| 3  | 5                                                          | 0.1200   | 1.8000   | 10.5000 | 1.6526  | 1.4718  | -1.0000 |         |        |
| 1  | 5                                                          | 0.2956   | 1.8399   | 10.6716 | 1.6878  | -1.0000 | -1.0000 |         |        |
| 2  | 6                                                          | 0.4912   | 1.6088   | 9.0157  | -1.0000 | -1.0000 | -1.0000 |         |        |
| 3  | 6                                                          | 0.0500   | 1.8600   | 9.9536  | 1.4743  | -1.0000 | 1.0000  |         |        |
| 5  | 6                                                          | 0.3620   | 2.7000   | 9.0056  | 0.0100  | -1.0000 | -1.0000 |         |        |
| 2  | 7                                                          | 0.0564   | 1.4937   | 12.0744 | 1.7276  | -1.0000 | -1.0000 |         |        |
| 3  | 7                                                          | 0.2017   | 1.8458   | 11.0700 | 1.6009  | -1.0000 | -1.0000 |         |        |
| 6  | 7                                                          | 0.3839   | 1.8924   | 13.0000 | 0.0100  | -1.0000 | 1.0000  |         |        |

|    |                                                               |        |          |          |        |          |         |          |        |
|----|---------------------------------------------------------------|--------|----------|----------|--------|----------|---------|----------|--------|
| 4  | 5                                                             | 0.3928 | 2.1116   | 11.2520  | 0.0100 | -1.0000  | -1.0000 |          |        |
| 4  | 6                                                             | 0.1939 | 2.0097   | 12.9613  | 0.0100 | -1.0000  | -1.0000 |          |        |
| 4  | 7                                                             | 0.2000 | 2.2000   | 11.3297  | 0.0100 | -1.0000  | -1.0000 |          |        |
| 5  | 7                                                             | 0.3918 | 2.8944   | 9.0000   | 0.0100 | -1.0000  | -1.0000 |          |        |
| 2  | 4                                                             | 0.1744 | 1.7715   | 10.4931  | 0.0100 | 0.0100   | -1.0000 |          |        |
| 56 | ! Nr of angles;at1;at2;at3;Thetao,o;ka;kb;pv1;pv2             |        |          |          |        |          |         |          |        |
| 1  | 1                                                             | 1      | 59.0573  | 30.7029  | 0.7606 | 0.0000   | 0.7180  | 6.2933   | 1.1244 |
| 1  | 1                                                             | 2      | 65.7758  | 14.5234  | 6.2481 | 0.0000   | 0.5665  | 0.0000   | 1.6255 |
| 2  | 1                                                             | 2      | 70.2607  | 25.2202  | 3.7312 | 0.0000   | 0.0050  | 0.0000   | 2.7500 |
| 1  | 2                                                             | 2      | 0.0000   | 0.0000   | 6.0000 | 0.0000   | 0.0000  | 0.0000   | 1.0400 |
| 1  | 2                                                             | 1      | 0.0000   | 3.4110   | 7.7350 | 0.0000   | 0.0000  | 0.0000   | 1.0400 |
| 2  | 2                                                             | 2      | 0.0000   | 27.9213  | 5.8635 | 0.0000   | 0.0000  | 0.0000   | 1.0400 |
| 1  | 1                                                             | 3      | 53.9517  | 7.8968   | 2.6122 | 0.0000   | 3.0000  | 58.6562  | 1.0338 |
| 3  | 1                                                             | 3      | 76.9627  | 44.2852  | 2.4177 | -25.3063 | 1.6334  | -50.0000 | 2.7392 |
| 2  | 1                                                             | 3      | 65.0000  | 16.3141  | 5.2730 | 0.0000   | 0.4448  | 0.0000   | 1.4077 |
| 1  | 3                                                             | 1      | 72.6199  | 42.5510  | 0.7205 | 0.0000   | 2.9294  | 0.0000   | 1.3096 |
| 1  | 3                                                             | 3      | 81.9029  | 32.2258  | 1.7397 | 0.0000   | 0.9888  | 68.1072  | 1.7777 |
| 3  | 3                                                             | 3      | 80.7324  | 30.4554  | 0.9953 | 0.0000   | 3.0000  | 50.0000  | 1.0783 |
| 1  | 3                                                             | 2      | 70.1101  | 13.1217  | 4.4734 | 0.0000   | 0.8433  | 0.0000   | 3.0000 |
| 2  | 3                                                             | 3      | 75.6935  | 50.0000  | 2.0000 | 0.0000   | 1.0000  | 0.0000   | 1.1680 |
| 2  | 3                                                             | 2      | 85.8000  | 9.8453   | 2.2720 | 0.0000   | 2.8635  | 0.0000   | 1.5800 |
| 1  | 2                                                             | 3      | 0.0000   | 25.0000  | 3.0000 | 0.0000   | 1.0000  | 0.0000   | 1.0400 |
| 3  | 2                                                             | 3      | 0.0000   | 15.0000  | 2.8900 | 0.0000   | 0.0000  | 0.0000   | 2.8774 |
| 2  | 2                                                             | 3      | 0.0000   | 8.5744   | 3.0000 | 0.0000   | 0.0000  | 0.0000   | 1.0421 |
| 3  | 4                                                             | 3      | 52.3622  | 9.6397   | 1.0379 | -12.5000 | 0.0755  | 0.0000   | 3.0000 |
| 2  | 3                                                             | 4      | 99.9653  | 44.2516  | 0.1000 | 0.0000   | 3.0722  | 0.0000   | 1.0400 |
| 3  | 3                                                             | 4      | 60.0000  | 40.0000  | 4.0000 | 0.0000   | 1.0000  | 0.0000   | 1.0400 |
| 3  | 2                                                             | 4      | 0.0000   | 10.0000  | 1.0000 | 0.0000   | 1.0000  | 0.0000   | 1.0400 |
| 2  | 4                                                             | 3      | 75.0000  | 25.0000  | 2.0000 | 0.0000   | 1.0000  | 0.0000   | 1.2500 |
| 4  | 3                                                             | 4      | 71.2348  | 36.4753  | 3.7821 | -1.9090  | 2.5489  | 0.0000   | 1.5801 |
| 1  | 3                                                             | 4      | 53.2386  | 27.6683  | 3.5448 | 0.0000   | 0.9129  | 0.0000   | 1.2759 |
| 3  | 4                                                             | 4      | 70.0000  | 25.0000  | 2.0000 | 0.0000   | 1.0000  | 0.0000   | 1.2500 |
| 3  | 5                                                             | 3      | 90.0000  | 30.4624  | 2.1468 | 0.0000   | 0.0500  | 0.0000   | 1.9485 |
| 5  | 3                                                             | 5      | 90.0000  | 5.7486   | 5.0000 | 0.0000   | 2.0000  | 0.0000   | 1.1000 |
| 3  | 3                                                             | 5      | 62.9344  | 15.0215  | 4.3743 | 0.0000   | 0.6168  | 0.0000   | 1.1673 |
| 3  | 5                                                             | 5      | 33.7127  | 8.0623   | 3.4580 | 0.0000   | 0.0500  | 0.0000   | 2.6065 |
| 2  | 3                                                             | 5      | 90.0000  | 9.7766   | 8.0000 | 0.0000   | 0.0505  | 0.0000   | 1.7257 |
| 1  | 3                                                             | 5      | 61.4655  | 39.8483  | 4.2082 | 0.0000   | 1.9793  | 0.0000   | 1.6005 |
| 1  | 5                                                             | 1      | 83.6785  | 13.3005  | 2.3764 | 0.0000   | 2.0000  | 0.0000   | 2.0851 |
| 5  | 1                                                             | 5      | 94.4356  | 19.9912  | 2.9221 | 0.0000   | 1.5337  | 0.0000   | 1.6359 |
| 1  | 5                                                             | 3      | 66.6190  | 9.5747   | 7.8475 | 0.0000   | 0.0500  | 0.0000   | 1.1000 |
| 1  | 1                                                             | 5      | 95.0666  | 9.4363   | 4.8061 | 0.0000   | 0.4005  | 0.0000   | 1.1784 |
| 3  | 6                                                             | 3      | -27.6827 | 7.7797   | 2.8604 | 0.0000   | 1.3898  | 0.0000   | 2.4524 |
| 2  | 3                                                             | 6      | 100.0000 | 0.6912   | 5.0000 | 0.0000   | 0.1035  | 0.0000   | 2.0174 |
| 6  | 3                                                             | 6      | 91.1462  | 5.0541   | 5.7059 | 0.0000   | 1.6088  | 0.0000   | 1.4410 |
| 5  | 3                                                             | 6      | 100.0000 | 9.1014   | 3.0000 | 0.0000   | 1.3806  | 0.0000   | 1.1936 |
| 3  | 2                                                             | 7      | 0.0000   | 4.2750   | 1.0250 | 0.0000   | 1.3750  | 0.0000   | 1.4750 |
| 2  | 2                                                             | 7      | 0.0000   | 3.0000   | 1.0000 | 0.0000   | 1.0000  | 0.0000   | 1.2500 |
| 7  | 2                                                             | 7      | 0.0000   | 20.2391  | 0.1328 | 0.0000   | 2.9860  | 0.0000   | 1.0870 |
| 2  | 3                                                             | 7      | 88.1144  | 13.2143  | 1.5068 | 0.0000   | 3.0000  | 0.0000   | 1.0100 |
| 3  | 3                                                             | 7      | 34.4326  | 25.9544  | 5.1239 | 0.0000   | 2.7500  | 0.0000   | 1.7141 |
| 7  | 3                                                             | 7      | 20.7204  | 13.4875  | 4.0000 | 0.0000   | 0.6619  | 0.0000   | 1.4098 |
| 2  | 7                                                             | 2      | 67.4229  | 4.5148   | 5.9702 | 0.0000   | 3.0000  | 0.0000   | 2.6879 |
| 2  | 7                                                             | 3      | 41.8108  | 17.3800  | 2.6618 | 0.0000   | 0.7372  | 0.0000   | 1.0100 |
| 3  | 7                                                             | 3      | 59.5433  | 20.0000  | 4.0000 | 0.0000   | 3.0000  | 0.0000   | 2.0988 |
| 2  | 7                                                             | 7      | 180.0000 | -26.7860 | 7.3549 | 0.0000   | 1.0000  | 0.0000   | 1.0252 |
| 2  | 7                                                             | 7      | 78.2279  | 37.6504  | 0.4809 | 0.0000   | 1.0000  | 0.0000   | 2.9475 |
| 6  | 3                                                             | 7      | 39.6976  | 7.5648   | 3.1234 | 0.0000   | 0.2151  | 0.0000   | 1.2915 |
| 4  | 3                                                             | 5      | 74.2241  | 6.7772   | 2.3445 | 0.0000   | 0.6613  | 0.0000   | 1.0000 |
| 4  | 3                                                             | 6      | 64.9363  | 10.0731  | 6.7665 | 0.0000   | 1.0000  | 0.0000   | 1.9956 |
| 4  | 3                                                             | 7      | 88.5948  | 10.6641  | 6.5332 | 0.0000   | 1.0000  | 0.0000   | 1.0000 |
| 5  | 3                                                             | 7      | 67.1070  | 10.0704  | 3.5000 | 0.0000   | 1.1378  | 0.0000   | 2.0094 |
| 40 | ! Nr of torsions;at1;at2;at3;at4;;V1;V2;V3;V2(BO);vconj;n.u;n |        |          |          |        |          |         |          |        |

|   |                                                  |   |        |         |          |         |         |         |        |        |
|---|--------------------------------------------------|---|--------|---------|----------|---------|---------|---------|--------|--------|
| 1 | 1                                                | 1 | 1      | -0.2500 | 34.7453  | 0.0288  | -6.3507 | -1.6000 | 0.0000 | 0.0000 |
| 1 | 1                                                | 1 | 2      | -0.2500 | 29.2131  | 0.2945  | -4.9581 | -2.1802 | 0.0000 | 0.0000 |
| 2 | 1                                                | 1 | 2      | -0.2500 | 31.2081  | 0.4539  | -4.8923 | -2.2677 | 0.0000 | 0.0000 |
| 1 | 1                                                | 1 | 3      | 1.2799  | 20.7787  | -0.5249 | -2.5000 | -1.0000 | 0.0000 | 0.0000 |
| 2 | 1                                                | 1 | 3      | 1.9159  | 19.8113  | 0.7914  | -4.6995 | -1.0000 | 0.0000 | 0.0000 |
| 3 | 1                                                | 1 | 3      | -1.4477 | 16.6853  | 0.6461  | -4.9622 | -1.0000 | 0.0000 | 0.0000 |
| 1 | 1                                                | 3 | 1      | 0.4816  | 19.6316  | -0.0057 | -2.5000 | -1.0000 | 0.0000 | 0.0000 |
| 1 | 1                                                | 3 | 2      | 1.2044  | 80.0000  | -0.3139 | -6.1481 | -1.0000 | 0.0000 | 0.0000 |
| 2 | 1                                                | 3 | 1      | -2.5000 | 31.0191  | 0.6165  | -2.7733 | -2.9807 | 0.0000 | 0.0000 |
| 2 | 1                                                | 3 | 2      | -2.4875 | 70.8145  | 0.7582  | -4.2274 | -3.0000 | 0.0000 | 0.0000 |
| 1 | 1                                                | 3 | 3      | -0.3566 | 10.0000  | 0.0816  | -2.6110 | -1.9631 | 0.0000 | 0.0000 |
| 2 | 1                                                | 3 | 3      | -1.4383 | 80.0000  | 1.0000  | -3.6877 | -2.8000 | 0.0000 | 0.0000 |
| 3 | 1                                                | 3 | 1      | -1.1390 | 78.0747  | -0.0964 | -4.5172 | -3.0000 | 0.0000 | 0.0000 |
| 3 | 1                                                | 3 | 2      | -2.5000 | 70.3345  | -1.0000 | -5.5315 | -3.0000 | 0.0000 | 0.0000 |
| 3 | 1                                                | 3 | 3      | -2.0234 | 80.0000  | 0.1684  | -3.1568 | -2.6174 | 0.0000 | 0.0000 |
| 1 | 3                                                | 3 | 1      | 1.1637  | -17.3637 | 0.5459  | -3.6005 | -2.6938 | 0.0000 | 0.0000 |
| 1 | 3                                                | 3 | 2      | -2.1289 | 12.8382  | 1.0000  | -5.6657 | -2.9759 | 0.0000 | 0.0000 |
| 2 | 3                                                | 3 | 2      | 2.5000  | -22.9397 | 0.6991  | -3.3961 | -1.0000 | 0.0000 | 0.0000 |
| 1 | 3                                                | 3 | 3      | 2.5000  | -25.0000 | 1.0000  | -2.5000 | -1.0000 | 0.0000 | 0.0000 |
| 2 | 3                                                | 3 | 3      | -2.5000 | -2.5103  | -1.0000 | -2.5000 | -1.0000 | 0.0000 | 0.0000 |
| 3 | 3                                                | 3 | 3      | -2.5000 | -25.0000 | 1.0000  | -2.5000 | -1.0000 | 0.0000 | 0.0000 |
| 0 | 1                                                | 2 | 0      | 0.0000  | 0.0000   | 0.0000  | 0.0000  | 0.0000  | 0.0000 | 0.0000 |
| 0 | 2                                                | 2 | 0      | 0.0000  | 0.0000   | 0.0000  | 0.0000  | 0.0000  | 0.0000 | 0.0000 |
| 0 | 2                                                | 3 | 0      | 0.0000  | 0.1000   | 0.0200  | -2.5415 | 0.0000  | 0.0000 | 0.0000 |
| 0 | 1                                                | 1 | 0      | 0.0000  | 50.0000  | 0.3000  | -4.0000 | -2.0000 | 0.0000 | 0.0000 |
| 1 | 1                                                | 3 | 3      | -0.0002 | 20.1851  | 0.1601  | -9.0000 | -2.0000 | 0.0000 | 0.0000 |
| 1 | 3                                                | 3 | 1      | 0.0002  | 80.0000  | -1.5000 | -4.4848 | -2.0000 | 0.0000 | 0.0000 |
| 3 | 1                                                | 3 | 3      | -0.1583 | 20.0000  | 1.5000  | -9.0000 | -2.0000 | 0.0000 | 0.0000 |
| 1 | 1                                                | 1 | 4      | -0.3232 | 14.3871  | 0.1823  | -9.8682 | -1.7255 | 0.0000 | 0.0000 |
| 4 | 1                                                | 1 | 4      | -0.1452 | 50.0000  | -0.1915 | -8.0773 | -1.7255 | 0.0000 | 0.0000 |
| 0 | 1                                                | 4 | 0      | 4.0000  | 45.8264  | 0.9000  | -4.0000 | 0.0000  | 0.0000 | 0.0000 |
| 0 | 4                                                | 4 | 0      | 4.0000  | 45.8264  | 0.9000  | -4.0000 | 0.0000  | 0.0000 | 0.0000 |
| 4 | 3                                                | 4 | 3      | 0.1946  | 20.0266  | -0.3314 | -8.1095 | 0.0000  | 0.0000 | 0.0000 |
| 2 | 1                                                | 3 | 4      | -0.1220 | 61.5112  | 0.3316  | -5.4970 | 0.0000  | 0.0000 | 0.0000 |
| 2 | 3                                                | 4 | 3      | -1.5000 | -1.0000  | 0.3045  | -2.5000 | 0.0000  | 0.0000 | 0.0000 |
| 1 | 3                                                | 4 | 3      | -0.9451 | 8.2456   | 0.5757  | -5.7138 | 0.0000  | 0.0000 | 0.0000 |
| 2 | 1                                                | 3 | 5      | 0.0000  | 84.3556  | 0.1000  | -3.1953 | 0.0000  | 0.0000 | 0.0000 |
| 1 | 1                                                | 3 | 5      | 0.0000  | 51.0461  | 0.1059  | -7.2043 | 0.0000  | 0.0000 | 0.0000 |
| 2 | 3                                                | 5 | 3      | -0.2500 | 0.0100   | -0.5000 | -4.6984 | 0.0000  | 0.0000 | 0.0000 |
| 2 | 3                                                | 6 | 3      | 0.0918  | 64.5743  | -1.0000 | -4.4228 | 0.0000  | 0.0000 | 0.0000 |
| 1 | ! Nr of hydrogen bonds;at1;at2;at3;Rhb;Dehb;vhb1 |   |        |         |          |         |         |         |        |        |
| 3 | 2                                                | 3 | 2.1200 | -3.5800 | 1.4500   | 19.5000 |         |         |        |        |
